# Supplementary material
Source: PubMed Central journal article supplement (PMC395987)
Supplement: pnas_101_16_5794__1.pdf [file pnas_101_16_5794__1.pdf]

## Supporting Methods and Materials

### Synthesis of Ketone 3 from Alcohol 4

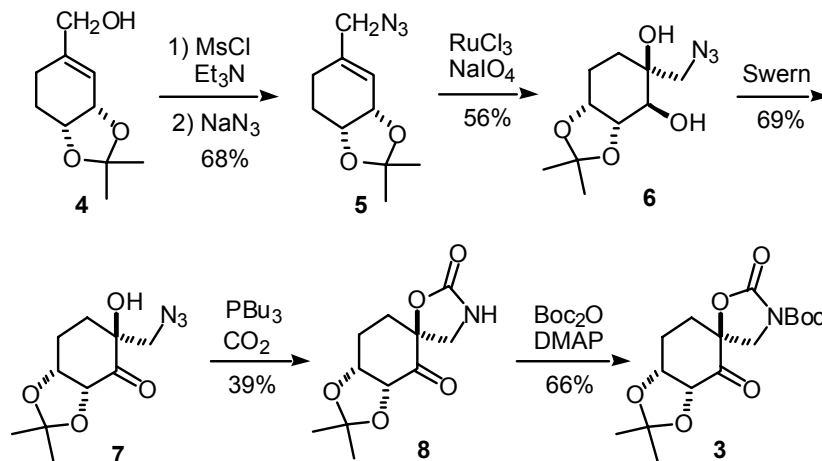

Alcohol 4 was prepared based on the reported procedure (1, 2).

**Preparation of Diol 6.** To a solution of alcohol 4 (3.43 g, 18.6 mmol) in CH<sub>2</sub>Cl<sub>2</sub> (10 ml) at 0°C were added Et<sub>3</sub>N (7.77 ml, 55.8 mmol) and MsCl (2.16 ml, 27.9 mmol). After stirring for 2 h, the solvent was removed by rotary evaporation. To the resulting residue was added acetone (20 ml) followed by a solution of NaN<sub>3</sub> (1.57 g, 24.2 mmol) in water (10.1 ml). After stirring at room temperature for an additional 16 h, the acetone was removed by rotary evaporation, and the aqueous layer was extracted with CH<sub>2</sub>Cl<sub>2</sub>. The combined organic layers were washed with brine, dried (Na<sub>2</sub>SO<sub>4</sub>), filtered, and concentrated to give azide 5 as an orange solid (2.65 g, 68%). An analytic sample was purified by flash chromatography (1:1 EtOAc/hexanes). The remainder of the material was used for the next step without additional purification. IR (film) 2,100 cm<sup>-1</sup>; <sup>1</sup>H NMR (300 MHz, CDCl<sub>3</sub>) δ = 5.69 (br s, 1H), 4.49 (m, 1H), 4.29 (m, 1H), 3.70 (s, 2H), 2.15 (m, 1H), 2.00–1.76 (m, 3H), 1.37 (s, 3H), 1.35 (s, 3H); <sup>13</sup>C NMR (75 MHz, CDCl<sub>3</sub>) δ = 136.8, 124.1, 108.7, 72.5, 71.8, 56.9, 28.2, 26.6, 25.6, 22.3.

To a solution of compound 5 (2.0 g, 9.56 mmol) in CH<sub>3</sub>CN (37 ml) and EtOAc (37 ml) at 0°C was added dropwise an aqueous solution containing RuCl<sub>3</sub> (0.14 g, 0.67 mmol) and NaIO<sub>4</sub> (2.66 g, 12.4 mmol) (11.8 ml) over 5 min. After an additional 15 min, the reaction was quenched with saturated Na<sub>2</sub>S<sub>2</sub>O<sub>3</sub> (15 ml). The layers were separated, and the aqueous layer was extracted with CH<sub>2</sub>Cl<sub>2</sub>. The combined organic layers were dried (Na<sub>2</sub>SO<sub>4</sub>), filtered, concentrated, and purified by flash chromatography (silica gel was buffered with 1% Et<sub>3</sub>N) (1:1 EtOAc/hexanes) to give diol 6 as a clear oil (1.30 g, 56%) (some amount of ketone 7 was isolated also) (0.57 g, 25%). [α]<sub>D</sub><sup>20</sup> = -44.2 (*c* = 0.095, CHCl<sub>3</sub>); IR (film) 3,430, 2,104 cm<sup>-1</sup>; <sup>1</sup>H NMR (300 MHz, CDCl<sub>3</sub>) δ = 4.31 (m, 1H), 4.00 (dd, *J* = 7.2, 5.1 Hz, 1H), 3.57 (dd, *J* = 7.2, 3.0 Hz, 1H), 3.45 (d, *J* = 12.3 Hz, 1H), 3.36

(d,  $J = 12.3$  Hz, 1H), 2.72 (br s, 1H), 2.37 (br s, 1H), 2.18–2.01 (m, 1H), 2.01–1.90 (m, 1H), 1.71–1.60 (m, 2H), 1.50 (s, 3H), 1.37 (s, 3H);  $^{13}\text{C}$  NMR (75 MHz,  $\text{CDCl}_3$ )  $\delta = 109.1, 80.2, 74.3, 74.1, 74.0, 58.4, 28.7, 27.5, 26.6, 21.6$ . High-resolution MS calcd for  $\text{C}_{10}\text{H}_{18}\text{N}_3\text{O}_4$  ( $M + 1$ ): 244.1297. Found: 244.1299.

**Preparation of Ketone 8.** To a solution of DMSO (0.10 ml, 1.44 mmol) in  $\text{CH}_2\text{Cl}_2$  (0.97 ml) at  $-78^\circ\text{C}$  was added dropwise oxalyl chloride (0.0664 ml, 0.77 mmol). After warming to room temperature for exactly 3 min, the reaction mixture was cooled to  $-78^\circ\text{C}$  again. A solution of alcohol **6** (0.14 g, 0.58 mmol) in  $\text{CH}_2\text{Cl}_2$  (5.3 ml) then was added dropwise. After the mixture was stirred at  $-78^\circ\text{C}$  for an additional 1.5 h,  $\text{Et}_3\text{N}$  (0.289 ml, 2.07 mmol) was added. The reaction mixture was allowed to warm to room temperature for 15 min. Saturated aqueous  $\text{NH}_4\text{Cl}$  was added, followed by water. The layers were separated, and the aqueous layer was extracted with  $\text{CH}_2\text{Cl}_2$ . The combined organic layers were washed with brine, dried ( $\text{Na}_2\text{SO}_4$ ), filtered, concentrated, and purified by flash chromatography (1:1 EtOAc/hexanes buffered with 1%  $\text{Et}_3\text{N}$ ) to give ketone **7** as a white solid (0.097 g, 69%) (note that the solvent used for packing the silica gel column and the eluent must be buffered with  $\text{Et}_3\text{N}$ ; otherwise, a large amount of ketal will be removed on the silica gel column). mp  $73\text{--}75^\circ\text{C}$ ;  $[\alpha]_{\text{D}}^{20} = -18.2$  ( $c = 0.055$ ,  $\text{CHCl}_3$ ); IR (film) 3,438, 2,107, 1,734  $\text{cm}^{-1}$ ;  $^1\text{H}$  NMR (300 MHz,  $\text{CDCl}_3$ )  $\delta = 4.78$  (d,  $J = 5.7$  Hz, 1H), 4.60 (m, 1H), 3.74 (d,  $J = 12.6$  Hz, 1H), 3.30 (d,  $J = 12.6$  Hz, 1H), 3.23 (s, 1H), 2.21 (m, 1H), 2.00–1.85 (m, 3H), 1.44 (s, 3H), 1.35 (s, 3H);  $^{13}\text{C}$  NMR (75 MHz,  $\text{CDCl}_3$ )  $\delta = 207.6, 110.3, 78.7, 78.0, 77.9, 56.4, 31.0, 27.0, 25.9, 21.8$ .

A solution of **7** (0.19 g, 0.79 mmol) in anhydrous  $\text{CH}_3\text{CN}$  (60 ml) (note that it is essential to use dry  $\text{CH}_3\text{CN}$ , because any incidental water in the reaction will give low yield) was sparged with  $\text{CO}_2$  in a three-necked round-bottomed flask equipped with a reflux condenser for  $\approx 2$  h. To this clear colorless solution was added dropwise  $\text{PBU}_3$  (0.20 g, 1.0 mmol) at room temperature. After stirring under  $\text{CO}_2$  to completion as monitored by TLC (2:1 EtOAc/hexanes), the clear yellow solution was concentrated and purified by flash chromatography (silica gel buffered with 2%  $\text{Et}_3\text{N}$ ) (2:1 EtOAc/hexanes) to give ketone **8** as an off-white solid (0.075 g, 39%) (note that this compound is typically isolated containing some tributylphosphine oxide; it is important to remove tributylphosphine oxide as much as possible, because the following reaction is tolerant of  $<5\%$  of tributylphosphine oxide).  $[\alpha]_{\text{D}}^{20} = -32.8$  ( $c = 0.5$ ,  $\text{CHCl}_3$ ); IR (film) 3,337, 1,771, 1,746  $\text{cm}^{-1}$ ;  $^1\text{H}$  NMR (300 MHz,  $\text{CDCl}_3$ )  $\delta = 5.71$  (br s, 1H), 4.85 (d,  $J = 5.1$  Hz, 1H), 4.63 (m, 1H), 4.34 (d,  $J = 8.9$  Hz, 1H), 3.16 ( $J = 8.9$  Hz, 1H), 2.50 (m, 1H), 2.30–2.00 (m, 3H), 1.43 (s, 3H), 1.40 (s, 3H);  $^{13}\text{C}$  NMR (75 MHz,  $\text{CDCl}_3$ )  $\delta = 201.4, 156.7, 110.0, 85.2, 78.8, 77.4, 44.4, 32.9, 27.1, 26.1, 21.1$ . High-resolution MS calcd for  $\text{C}_{11}\text{H}_{16}\text{NO}_5$  ( $M + 1$ ): 242.1028. Found: 242.1029.

**Preparation of Ketone 3.** To a solution of **8** (0.075 g, 0.31 mmol) in tetrahydrofuran (2 ml) at room temperature was added di-*tert*-butyldicarbonate (0.088 g, 0.40 mmol) followed by a solution of 4-(dimethylamino)pyridine in tetrahydrofuran (0.1 M, 0.01 ml, 0.001 mmol). After stirring to completion as monitored by TLC (2:1 EtOAc/hexanes) ( $\approx 30$  min), the mixture was filtered immediately through a prepacked silica gel plug (buffered with 2%  $\text{Et}_3\text{N}$ ) and washed with EtOAc/hexanes (1:1). The combined filtrate

was concentrated and purified by flash chromatography (silica gel buffered with 2% Et<sub>3</sub>N) (1:2 ether/hexanes) to give ketone **3** as a white solid (0.070 g, 66%): mp 130–132°C;  $[\alpha]_D^{20} = -20$  ( $c = 0.1$ , CHCl<sub>3</sub>); IR (film) 1,824, 1,747, 1,728 cm<sup>-1</sup>; <sup>1</sup>H NMR (300 MHz, CDCl<sub>3</sub>)  $\delta = 4.82$  (d,  $J = 5.1$  Hz, 1H), 4.64 (d,  $J = 10.6$  Hz, 1H), 4.62 (m, 1H), 3.48 (d,  $J = 10.6$  Hz, 1H), 2.45 (m, 1H), 2.20 (m, 3H), 1.54 (s, 9H), 1.44 (s, 3H), 1.41 (s, 3H); <sup>13</sup>C NMR (75 MHz, CDCl<sub>3</sub>)  $\delta = 201.1, 150.0, 148.9, 110.4, 84.7, 81.4, 78.9, 77.3, 47.5, 32.8, 28.0, 27.2, 26.1, 21.0$ . High-resolution MS calcd for C<sub>16</sub>H<sub>24</sub>NO<sub>7</sub> (M + 1): 342.1553. Found: 342.1545.

The chromatograms for the determination of enantiomeric excess of the epoxides.

(R)-Styrene oxide (Table 1, Entry 1)

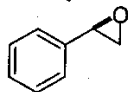

GC Conditions: Column: Chiraldex B-DM (Cat. No. 77023), Adv. Separation Technologies, Inc. Oven: 80 °C; Carrier: Helium, head pressure 25 psi; Detection: FID 250 °C

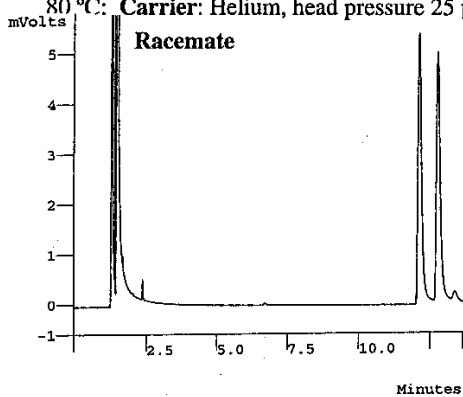

| Peak No | Peak Name | Result () | Ret. Time (min) |
|---------|-----------|-----------|-----------------|
| 1       |           | 50.0995   | 12.099          |
| 2       |           | 49.9005   | 12.743          |
| Totals  |           | 100.0000  |                 |

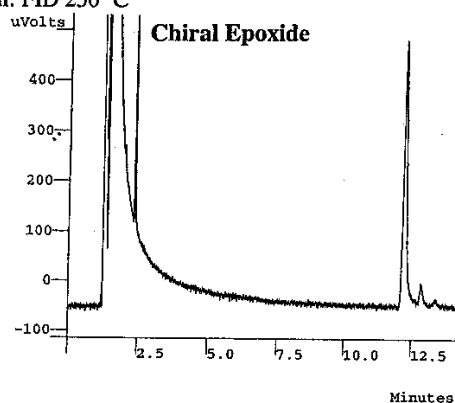

| Peak No | Peak Name | Result () | Ret. Time (min) |
|---------|-----------|-----------|-----------------|
| 1       |           | 95.0540   | 12.182          |
| 2       |           | 4.9460    | 12.849          |
| Totals  |           | 100.0000  |                 |

2-Fluorostyrene oxide (Table 1, Entry 2)

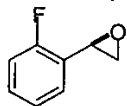

GC Conditions: Column: Chiraldex B-DM (Cat. No. 77023), Adv. Separation Technologies, Inc. Oven: 80 °C; Carrier: Helium, head pressure 25 psi; Detection: FID 250 °C

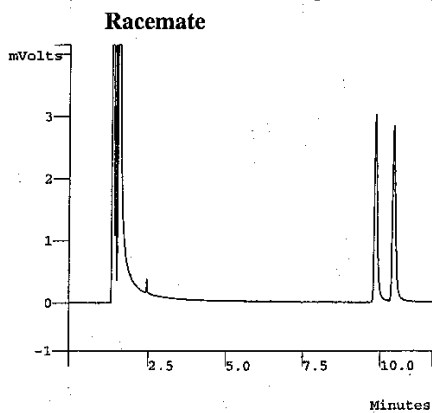

| Peak No | Peak Name | Result () | Ret. Time (min) |
|---------|-----------|-----------|-----------------|
| 1       |           | 50.3680   | 9.824           |
| 2       |           | 49.6320   | 10.394          |
| Totals  |           | 100.0000  |                 |

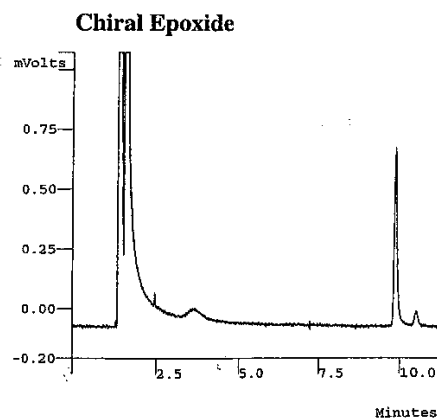

| Peak No | Peak Name | Result () | Ret. Time (min) |
|---------|-----------|-----------|-----------------|
| 1       |           | 94.3897   | 9.849           |
| 2       |           | 5.6103    | 10.441          |
| Totals  |           | 100.0000  |                 |

**3-Fluorostyrene oxide (Table 1, Entry 3)**

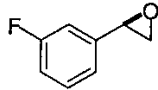

**GC Conditions:** Column: Chiraldex G-TA (Cat. No. 73033), Adv. Separation Technologies, Inc. Oven: 100 °C; Carrier: Helium, head pressure 25 psi; Detection: FID 250 °C

**Racemate**

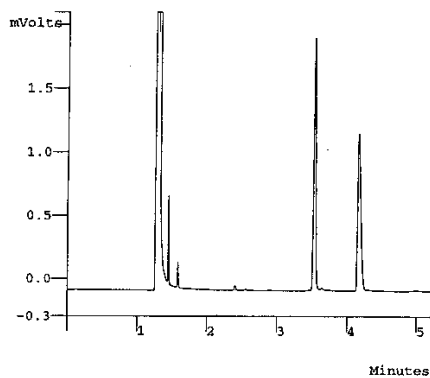

| Peak No       | Peak Name | Result ()       | Ret. Time (min) |
|---------------|-----------|-----------------|-----------------|
| 1             |           | 50.4681         | 3.516           |
| 2             |           | 49.5319         | 4.151           |
| <b>Totals</b> |           | <b>100.0000</b> |                 |

**Chiral Epoxide**

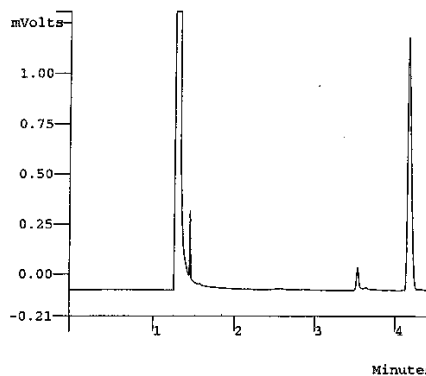

| Peak No       | Peak Name | Result ()       | Ret. Time (min) |
|---------------|-----------|-----------------|-----------------|
| 1             |           | 5.1969          | 3.531           |
| 2             |           | 94.8031         | 4.154           |
| <b>Totals</b> |           | <b>100.0000</b> |                 |

**3-Methylstyrene oxide (Table 1, Entry 4)**

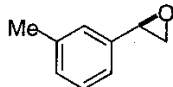

**GC Conditions:** Column: Chiraldex B-DM (Cat. No. 77023), Adv. Separation Technologies, Inc. Oven: 60 °C; Carrier: Helium, head pressure 20 psi; Detection: FID 250 °C

**Racemate**

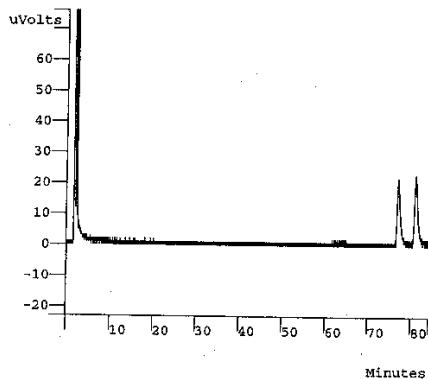

| Peak No       | Peak Name | Result ()       | Ret. Time (min) |
|---------------|-----------|-----------------|-----------------|
| 1             |           | 50.1996         | 76.842          |
| 2             |           | 49.8004         | 80.891          |
| <b>Totals</b> |           | <b>100.0000</b> |                 |

**Chiral Epoxide**

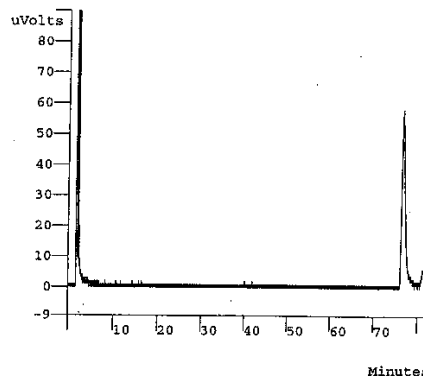

| Peak No       | Peak Name | Result ()       | Ret. Time (min) |
|---------------|-----------|-----------------|-----------------|
| 1             |           | 96.2861         | 76.427          |
| 2             |           | 3.7139          | 81.033          |
| <b>Totals</b> |           | <b>100.0000</b> |                 |

**3,5-Dimethylstyrene oxide (Table 1, Entry 5)**

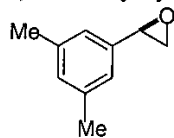

**GC Conditions:** Column: Chiraldex B-DM (Cat. No. 77023), Adv. Separation Technologies, Inc. Oven: 70 °C; Carrier: Helium, head pressure 20 psi; Detection: FID 250 °C

**Racemate**

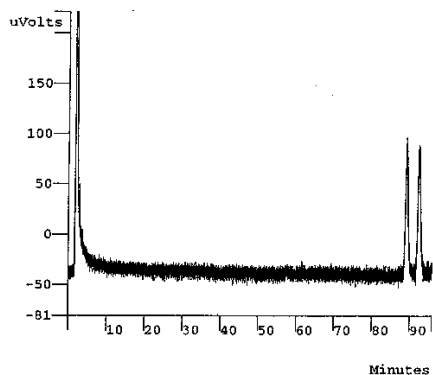

| Peak No | Peak Name | Result () | Ret. Time (min) |
|---------|-----------|-----------|-----------------|
| 1       |           | 49.2782   | 89.007          |
| 2       |           | 50.7218   | 92.313          |
| Totals  |           | 100.0000  |                 |

**Chiral Epoxide**

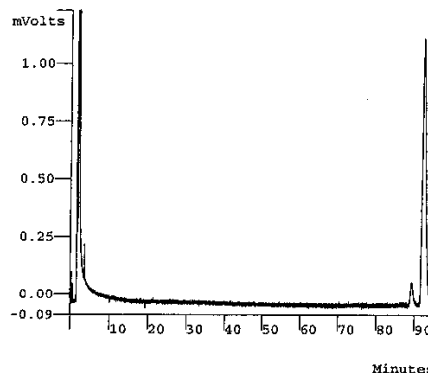

| Peak No | Peak Name | Result () | Ret. Time (min) |
|---------|-----------|-----------|-----------------|
| 1       |           | 5.2812    | 89.283          |
| 2       |           | 94.7188   | 91.923          |
| Totals  |           | 100.0000  |                 |

**(R)-4-Fluorostyrene oxide (Table 1, Entry 6)**

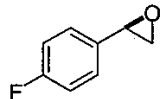

**GC Conditions:** Column: Chiraldex B-DM (Cat. No. 77023), Adv. Separation Technologies, Inc. Oven: 80 °C; Carrier: Helium, head pressure 25 psi; Detection: FID 250 °C

**Racemate**

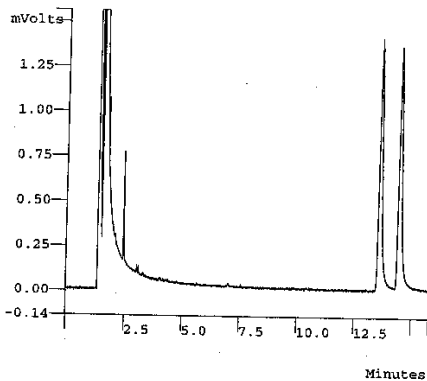

| Peak No | Peak Name | Result () | Ret. Time (min) |
|---------|-----------|-----------|-----------------|
| 1       |           | 49.6178   | 13.568          |
| 2       |           | 50.3822   | 14.424          |
| Totals  |           | 100.0000  |                 |

**Chiral Epoxide**

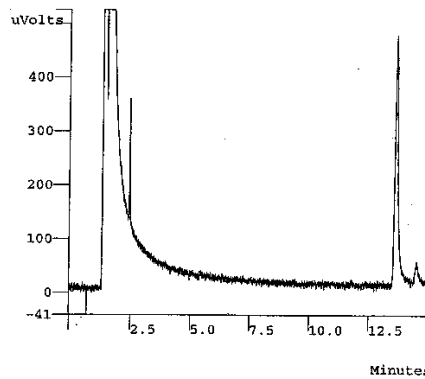

| Peak No | Peak Name | Result () | Ret. Time (min) |
|---------|-----------|-----------|-----------------|
| 1       |           | 95.1250   | 13.601          |
| 2       |           | 4.8750    | 14.481          |
| Totals  |           | 100.0000  |                 |

**(R)-4-Chlorostyrene oxide (Table 1, Entry 7)**

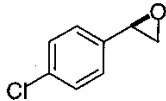

**GC Conditions:** Column: Chiraldex B-DM (Cat. No. 77023), Adv. Separation Technologies, Inc. Oven: 100 °C; Carrier: Helium, head pressure 25 psi; Detection: FID 250 °C

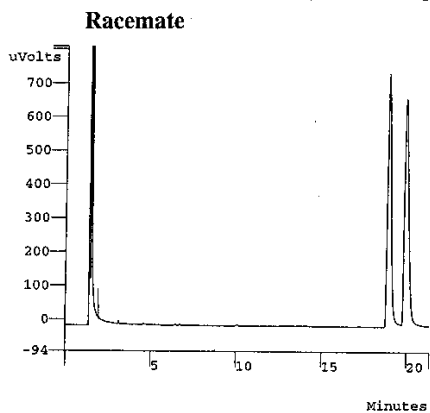

| Peak No       | Peak Name | Result ()       | Ret. Time (min) |
|---------------|-----------|-----------------|-----------------|
| 1             |           | 49.4743         | 18.849          |
| 2             |           | 50.5257         | 19.868          |
| <b>Totals</b> |           | <b>100.0000</b> |                 |

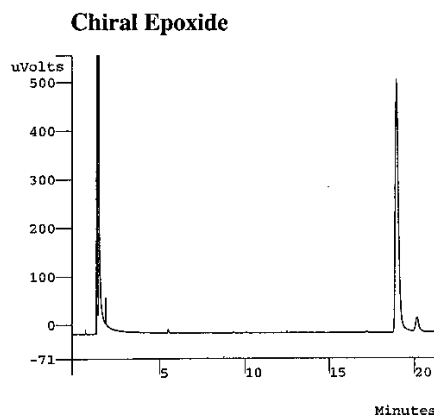

| Peak No       | Peak Name | Result ()       | Ret. Time (min) |
|---------------|-----------|-----------------|-----------------|
| 1             |           | 95.3065         | 18.954          |
| 2             |           | 4.6935          | 20.134          |
| <b>Totals</b> |           | <b>100.0000</b> |                 |

**(R)-4-Bromostyrene oxide (Table 1, Entry 8)**

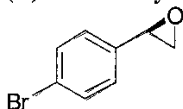

**GC Conditions:** Column: Chiraldex B-DM (Cat. No. 77023), Adv. Separation Technologies, Inc. Oven: 110 °C; Carrier: Helium, head pressure 25 psi; Detection: FID 250 °C

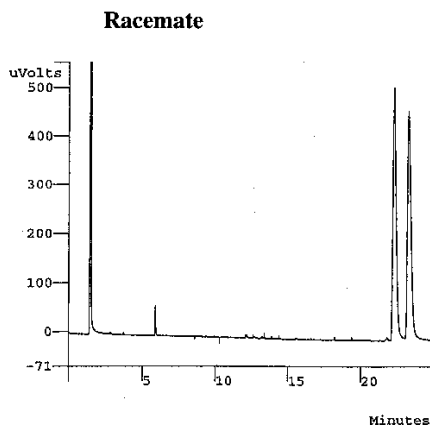

| Peak No       | Peak Name | Result ()       | Ret. Time (min) |
|---------------|-----------|-----------------|-----------------|
| 1             |           | 49.4556         | 22.192          |
| 2             |           | 50.5444         | 23.179          |
| <b>Totals</b> |           | <b>100.0000</b> |                 |

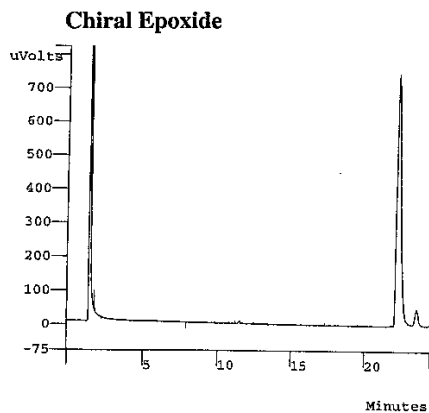

| Peak No       | Peak Name | Result ()       | Ret. Time (min) |
|---------------|-----------|-----------------|-----------------|
| 1             |           | 95.2081         | 22.126          |
| 2             |           | 4.7919          | 23.397          |
| <b>Totals</b> |           | <b>100.0000</b> |                 |

**(R)-4-Methylstyrene oxide (Table 1, Entry 9)**

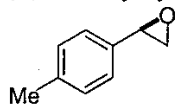

**GC Conditions:** Column: Chiraldex B-DM (Cat. No. 77023), Adv. Separation Technologies, Inc. Oven: 70 °C; Carrier: Helium, head pressure 20 psi; Detection: FID 250 °C

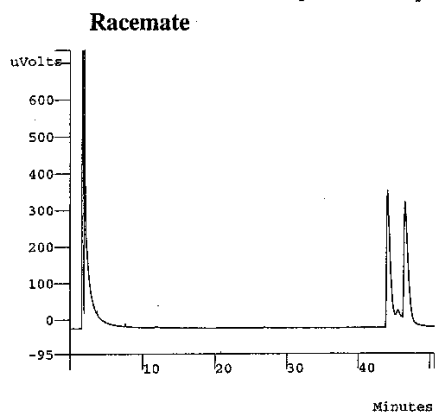

| Peak No       | Peak Name | Result ()       | Ret. Time (min) |
|---------------|-----------|-----------------|-----------------|
| 1             |           | 49.7335         | 44.049          |
| 2             |           | 50.2665         | 46.476          |
| <b>Totals</b> |           | <b>100.0000</b> |                 |

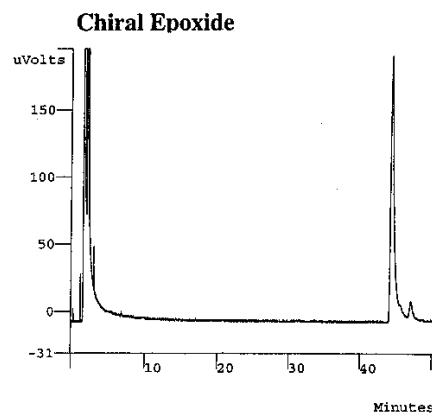

| Peak No       | Peak Name | Result ()       | Ret. Time (min) |
|---------------|-----------|-----------------|-----------------|
| 1             |           | 94.8427         | 44.322          |
| 2             |           | 5.1573          | 47.112          |
| <b>Totals</b> |           | <b>100.0000</b> |                 |

**4-Trifluoromethylstyrene oxide (Table 1, Entry 10)**

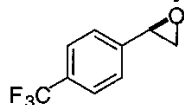

**GC Conditions:** Column: Chiraldex B-DM (Cat. No. 77023), Adv. Separation Technologies, Inc. Oven: 80 °C; Carrier: Helium, head pressure 20 psi; Detection: FID 250 °C

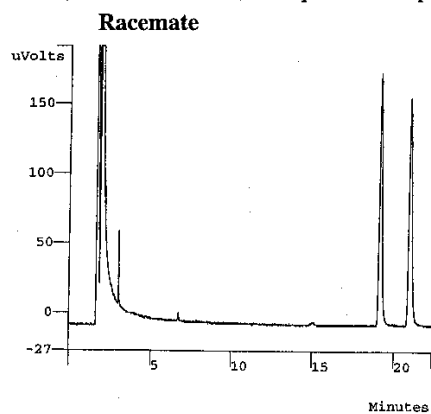

| Peak No       | Peak Name | Result ()       | Ret. Time (min) |
|---------------|-----------|-----------------|-----------------|
| 1             |           | 50.3194         | 19.104          |
| 2             |           | 49.6806         | 20.927          |
| <b>Totals</b> |           | <b>100.0000</b> |                 |

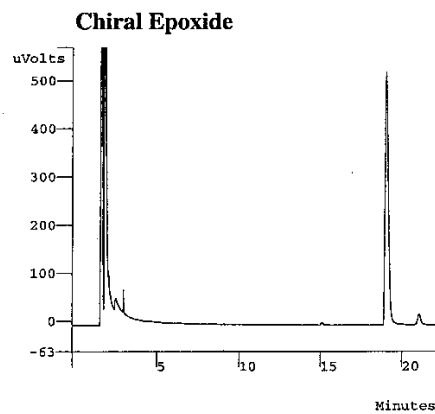

| Peak No       | Peak Name | Result ()       | Ret. Time (min) |
|---------------|-----------|-----------------|-----------------|
| 1             |           | 96.6186         | 18.981          |
| 2             |           | 3.3814          | 21.014          |
| <b>Totals</b> |           | <b>100.0000</b> |                 |



(R)-4-Cyanostyrene oxide (Table 1, Entry 11)

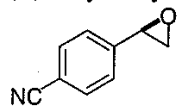

GC Conditions: Column: Chiraldex B-DM (Cat. No. 77023), Adv. Separation Technologies, Inc. Oven: 115 °C; Carrier: Helium, head pressure 25 psi; Detection: FID 250 °C

Racemate

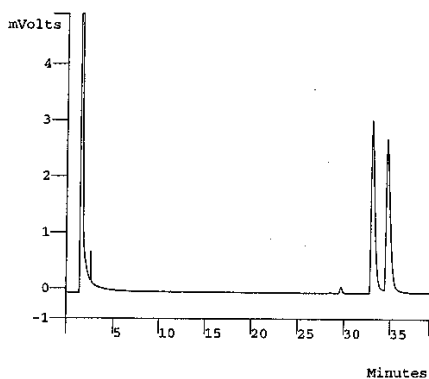

| Peak No | Peak Name | Result () | Ret. Time (min) |
|---------|-----------|-----------|-----------------|
| 1       |           | 49.7992   | 32.951          |
| 2       |           | 50.2008   | 34.572          |
| Totals  |           | 100.0000  |                 |

Chiral Epoxide

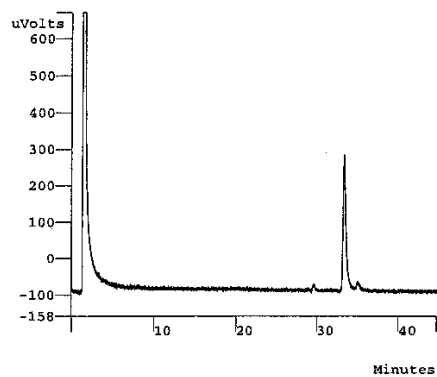

| Peak No | Peak Name | Result () | Ret. Time (min) |
|---------|-----------|-----------|-----------------|
| 1       |           | 96.2704   | 33.316          |
| 2       |           | 3.7296    | 35.026          |
| Totals  |           | 100.0000  |                 |

1. McComsey, D. F. & Maryanoff, B. E. (1994) *J. Org. Chem.* **59**, 2652–2654.
2. Wang, Z.-X., Miller, S. M., Anderson, O. P. & Shi, Y. (2001) *J. Org. Chem.* **66**, 521–530.
